# Supplementary material
Source: HighWire-hosted journal article supplement (http://www.qdcxjkg.com/highwire/filestream/113724/field_highwire_adjunct_files/1/Table_S1_search_strategy.pdf)
Supplement: Table_S1_search_strategy.pdf [file Table_S1_search_strategy.pdf]

Aug. 10, 2009

**Supplementary Table S1 Search strategy for PubMed**

((blacks OR african americans OR africans OR population OR race OR racial OR ethnic\*) OR ((population Groups MeSH))) AND (lung function OR spirometry OR vital capacity OR forced expiratory volume) AND ((Humans[MeSH])) AND (((((((("Spirometry"[MeSH])) AND ("Population Groups"[MeSH]))) OR (("Lung Volume Measurements"[MeSH] AND ("Population Groups"[MeSH]))) OR (("Population Groups"[MeSH]) AND ("Vital Capacity"[MeSH]))) OR ((blacks OR african americans OR africans OR population OR race OR racial OR ethnic) OR ("Population Groups"[MeSH]))) AND (tidal volume OR inspiratory capacity OR lung function OR spirometry OR vital capacity OR lung volume measurements OR total lung capacity)
